# Supplementary material for: Single red emission from upconverting ZnGa2O4:Yb,Er nanoparticles co-doped by Cr3+
Source: Royal Society of Chemistry journal article supplement (doi:10.1039/d0tc00411a), 2020-01-01
Supplement: d0tc00411a1.pdf [file d0tc00411a1.pdf]

## Electronic Supplementary Information

### Singular red emission from upconverting $\text{ZnGa}_2\text{O}_4:\text{Yb},\text{Er}$ nanoparticles co-doped by $\text{Cr}^{3+}$

Bhupendra B. Srivastava<sup>1</sup>, Santosh K. Gupta<sup>2</sup>, and Yuanbing Mao<sup>3,\*</sup>

<sup>1</sup>Department of Chemistry, University of Texas Rio Grande Valley, 1201 West University Drive, Edinburg, Texas 78539, USA

<sup>2</sup>Radiochemistry Division, Bhabha Atomic Research Centre, Trombay, Mumbai 400085, India

<sup>3</sup>Department of Chemistry, Illinois Institute of Technology, 3105 South Dearborn Street, Chicago, IL 60616, USA

\*To whom correspondence should be addressed. E-mail: ymao17@iit.edu, Tel.: +1-312-567-3815

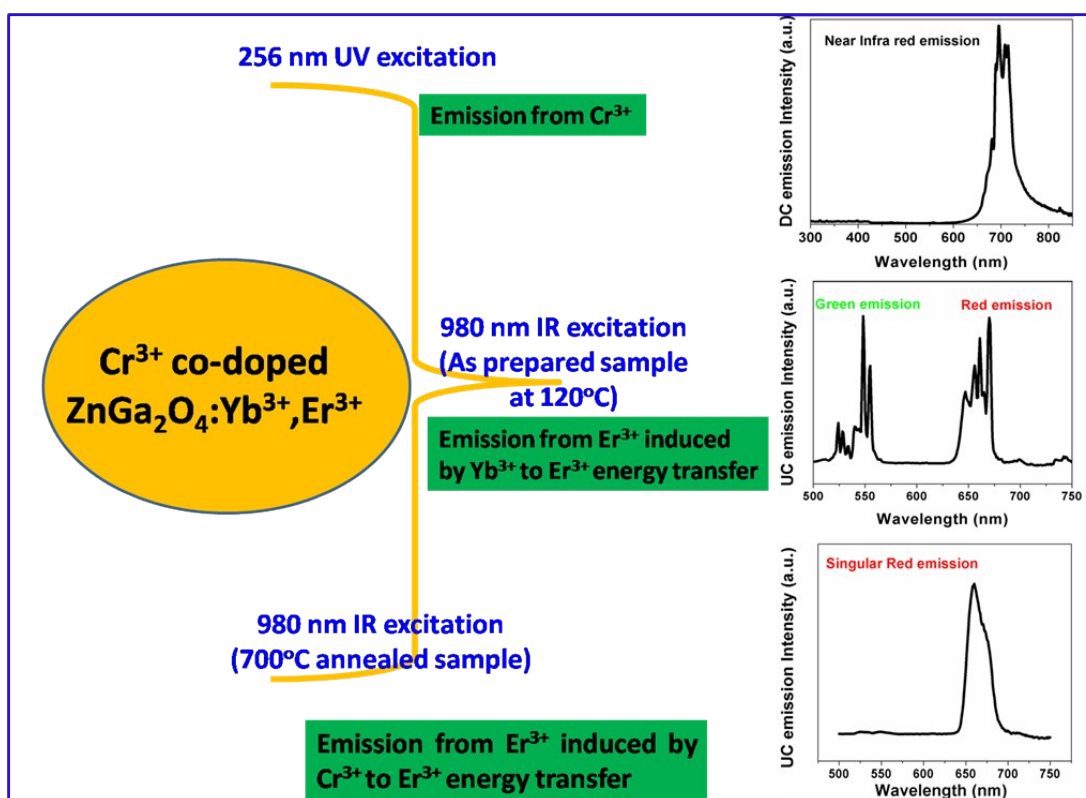

**Figure S1.** Schematic showing three different emissions: (a) DC NIR emission  $\sim 700$  nm under UV excitation, (b) UC singular red emission from the ZGO-YEC-700 NPs under 980 nm excitation, and (c) UC dual red and green emissions from the ZGO-YEC-AP NPs under 980 nm excitation.

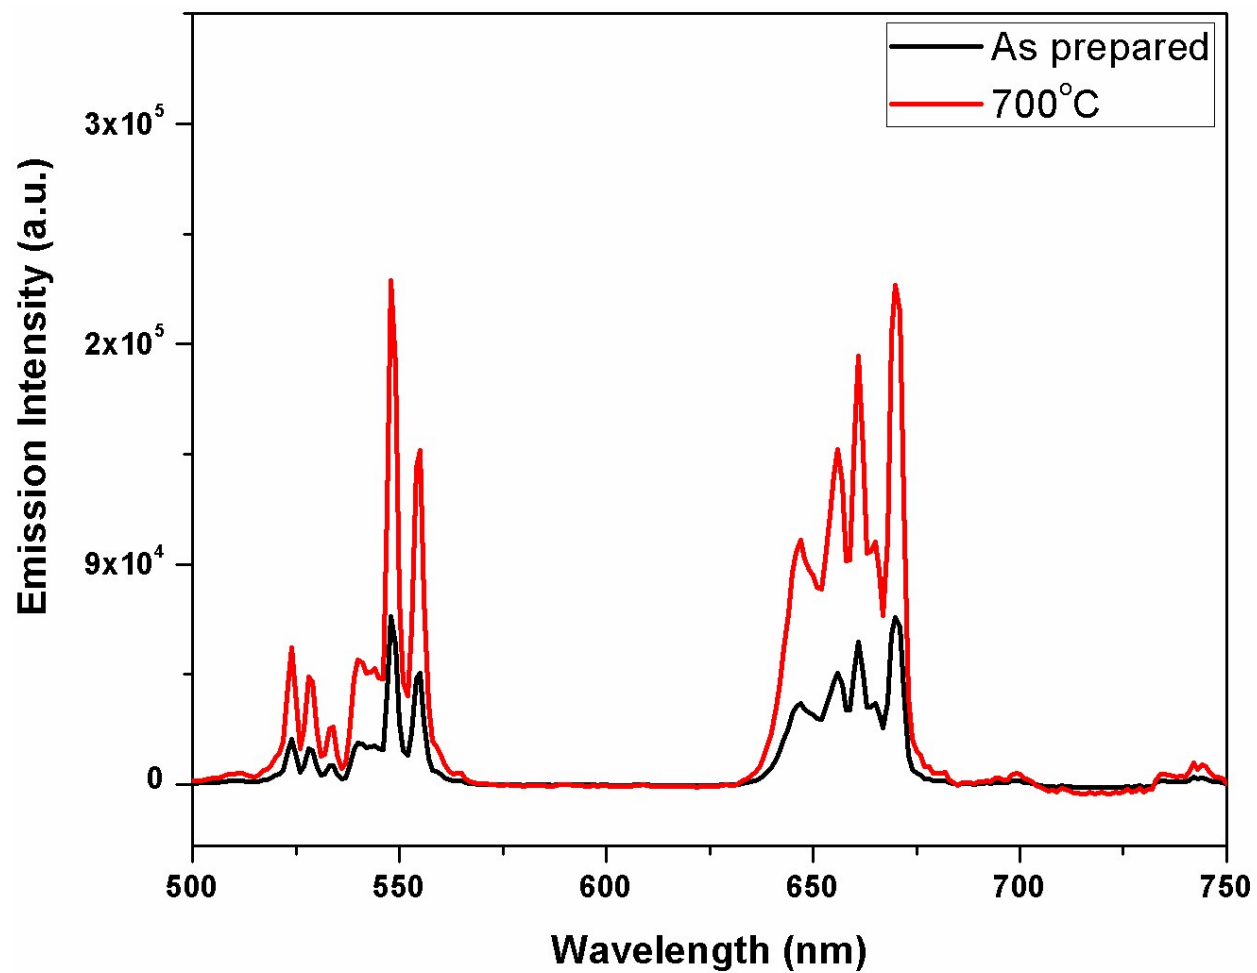

**Figure S2.** Emission spectra of the as-prepared and the thermally treated ZGO-YE NPs without chromium doping.

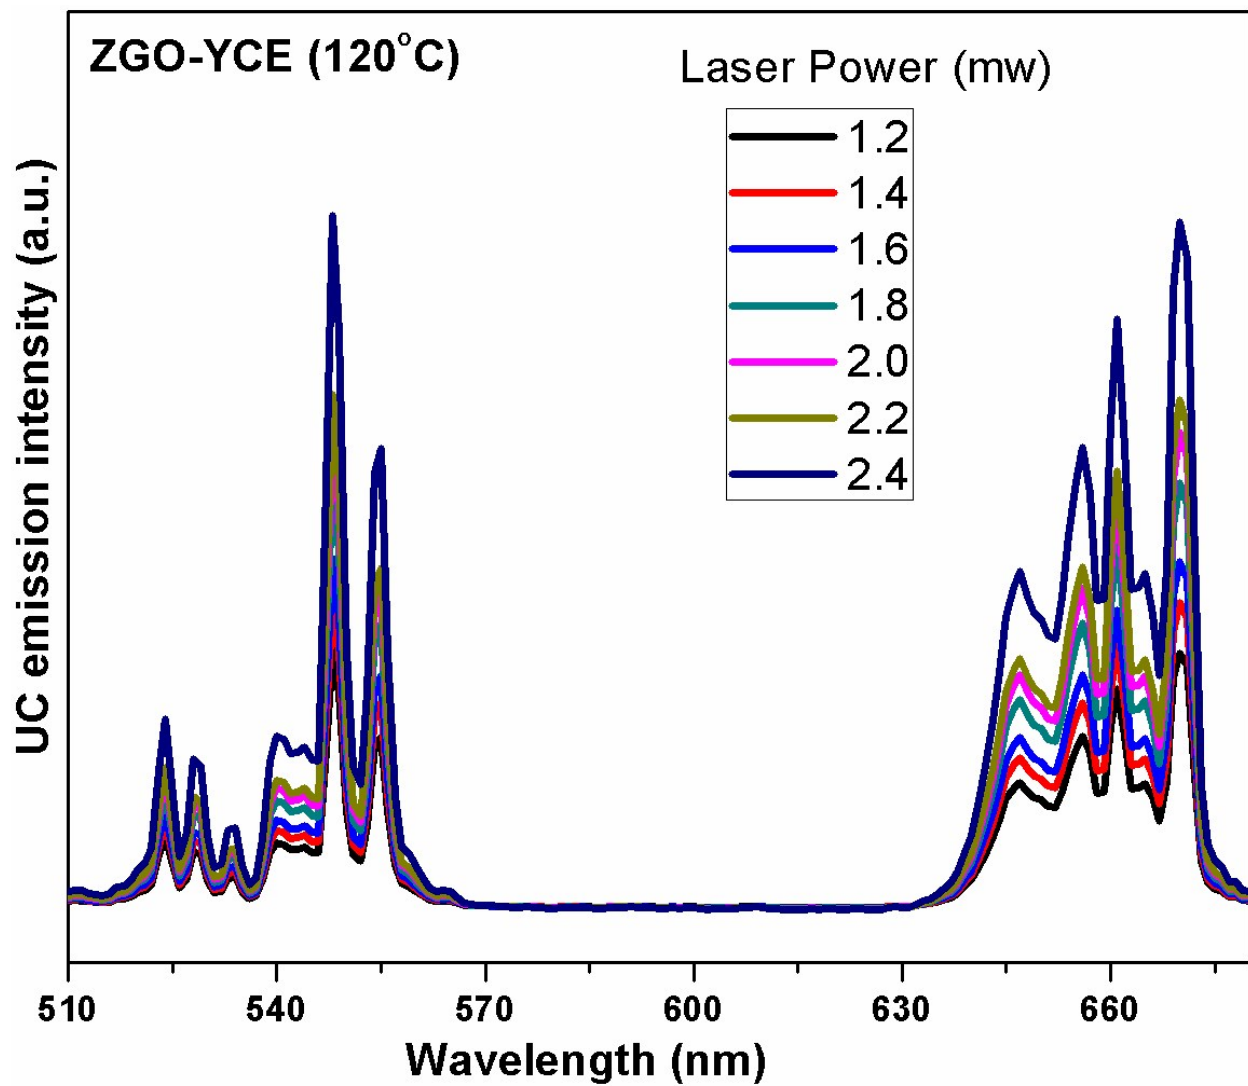

Figure S3. UC emission spectra of the ZGO-YEC-AP excited at different laser powers.

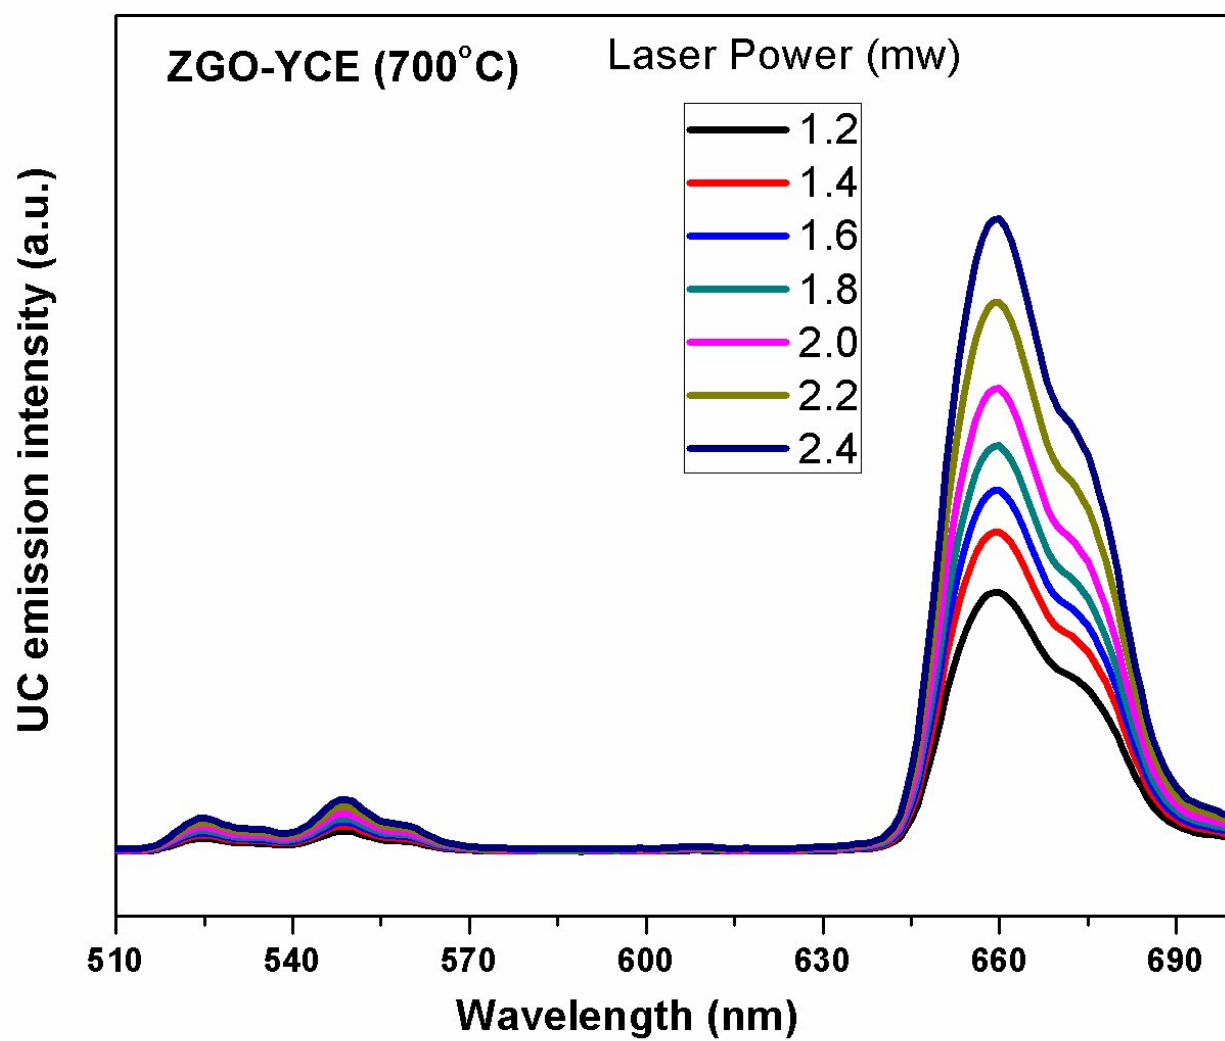

Figure S4. UC emission spectra of the ZGO-YEC-700 excited with different laser powers.

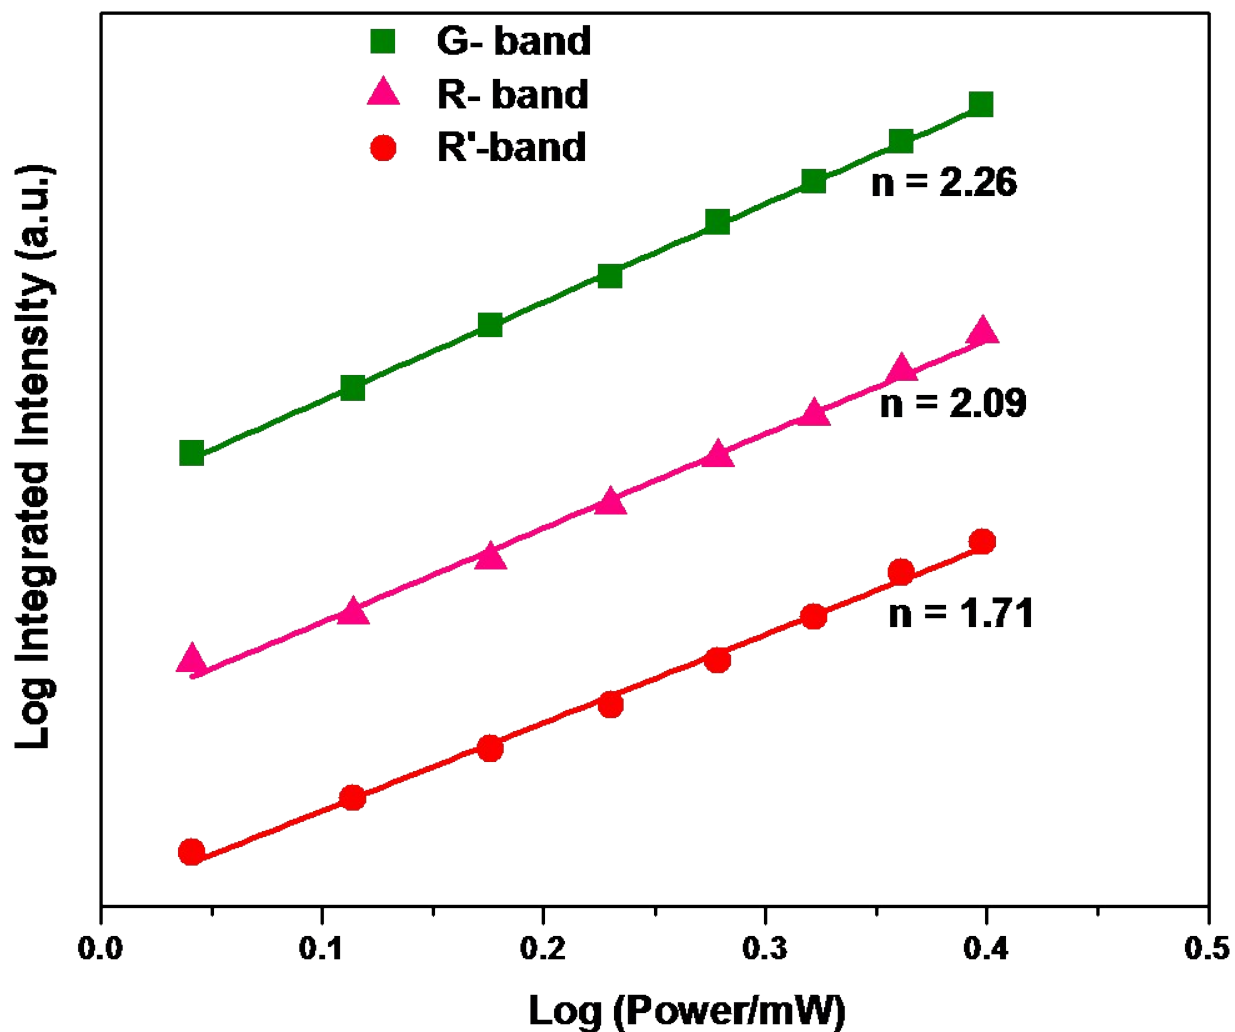

**Figure S5.** Log–log plot of UC emission intensity vs laser power for involving 550 nm (G-band) and 660 nm (R-band) peaks of the ZGO-YEC-AP NPs and that of only 660 nm (R'- band) peak from the ZGO-YEC-700 NPs.
